# Supplementary material
Source: PubMed Central journal article supplement (PMC2999924)
Supplement: supp_D008094_jlr.D008094-1.pdf [file supp_D008094_jlr.D008094-1.pdf]

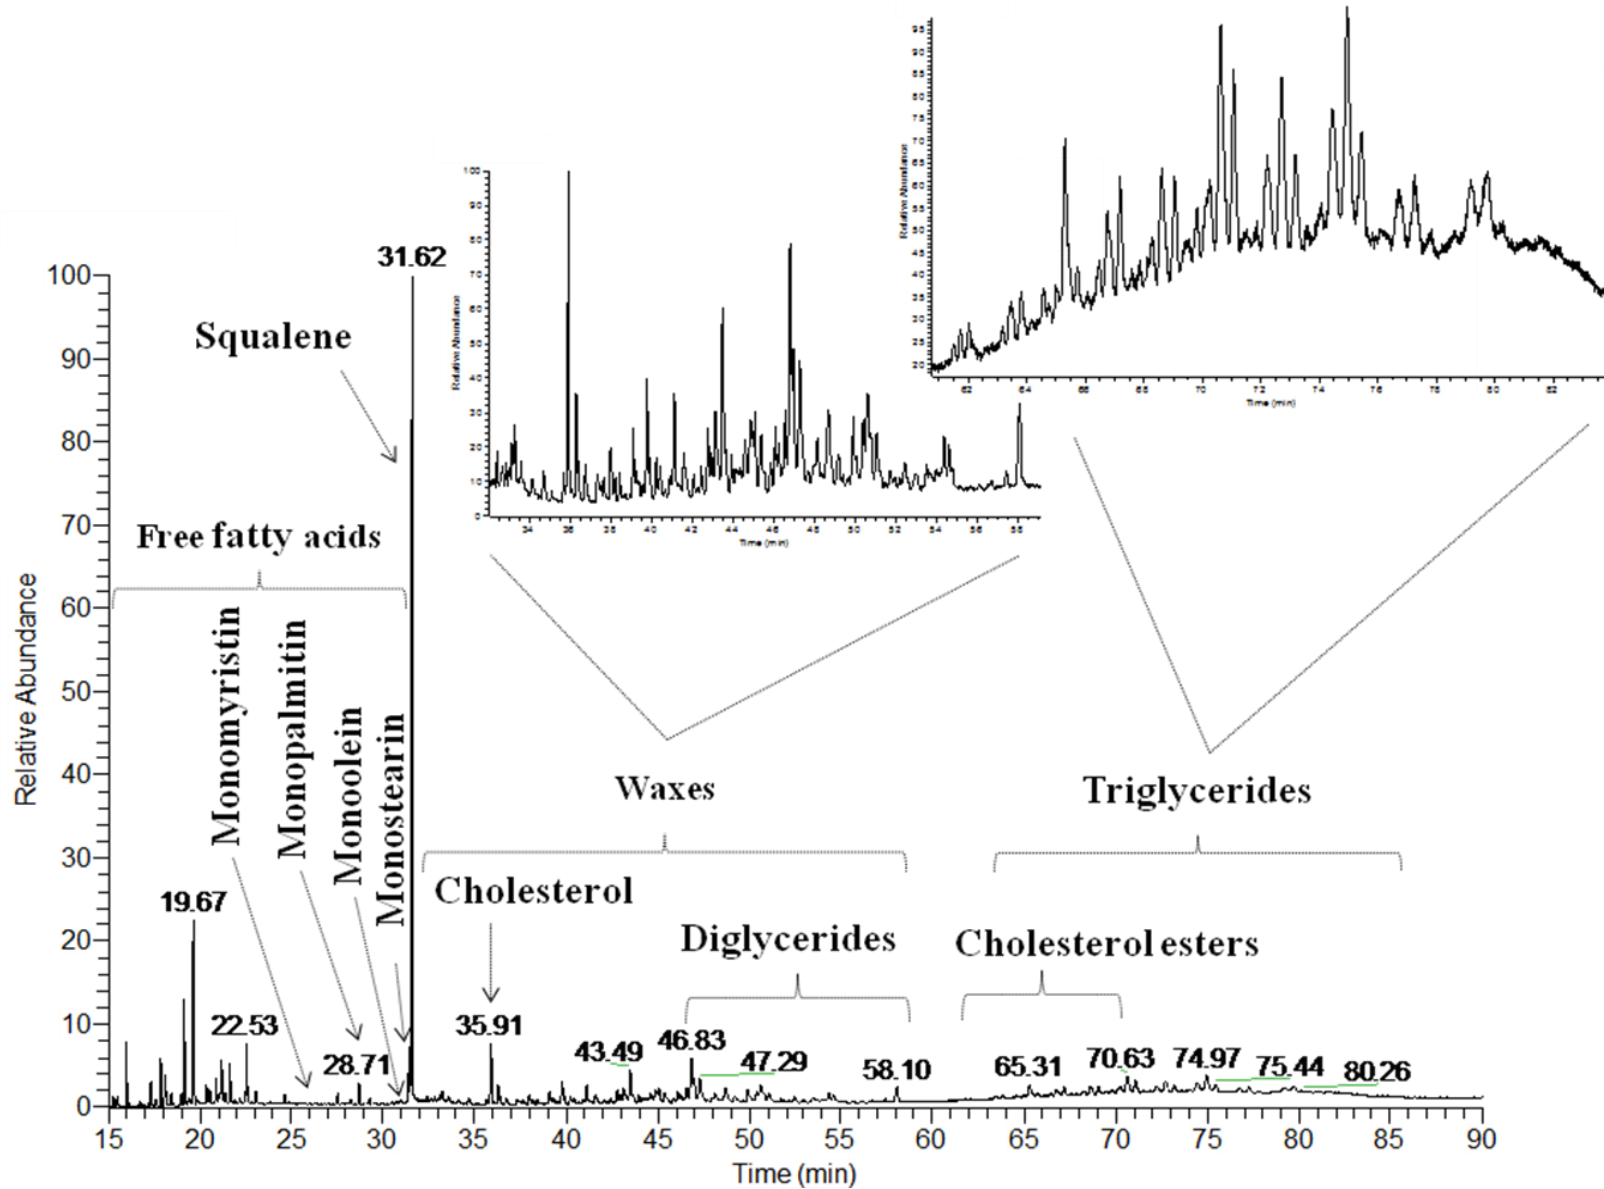

Figure 1. HTGC-MS profile of trimethylsilylated SSL sample (analyzed as mentioned in Materials and methods).
