# Supplementary material
Source: PubMed Central journal article supplement (PMC2999924)
Supplement: supp_D008094_jlr.D008094-2.pdf [file supp_D008094_jlr.D008094-2.pdf]

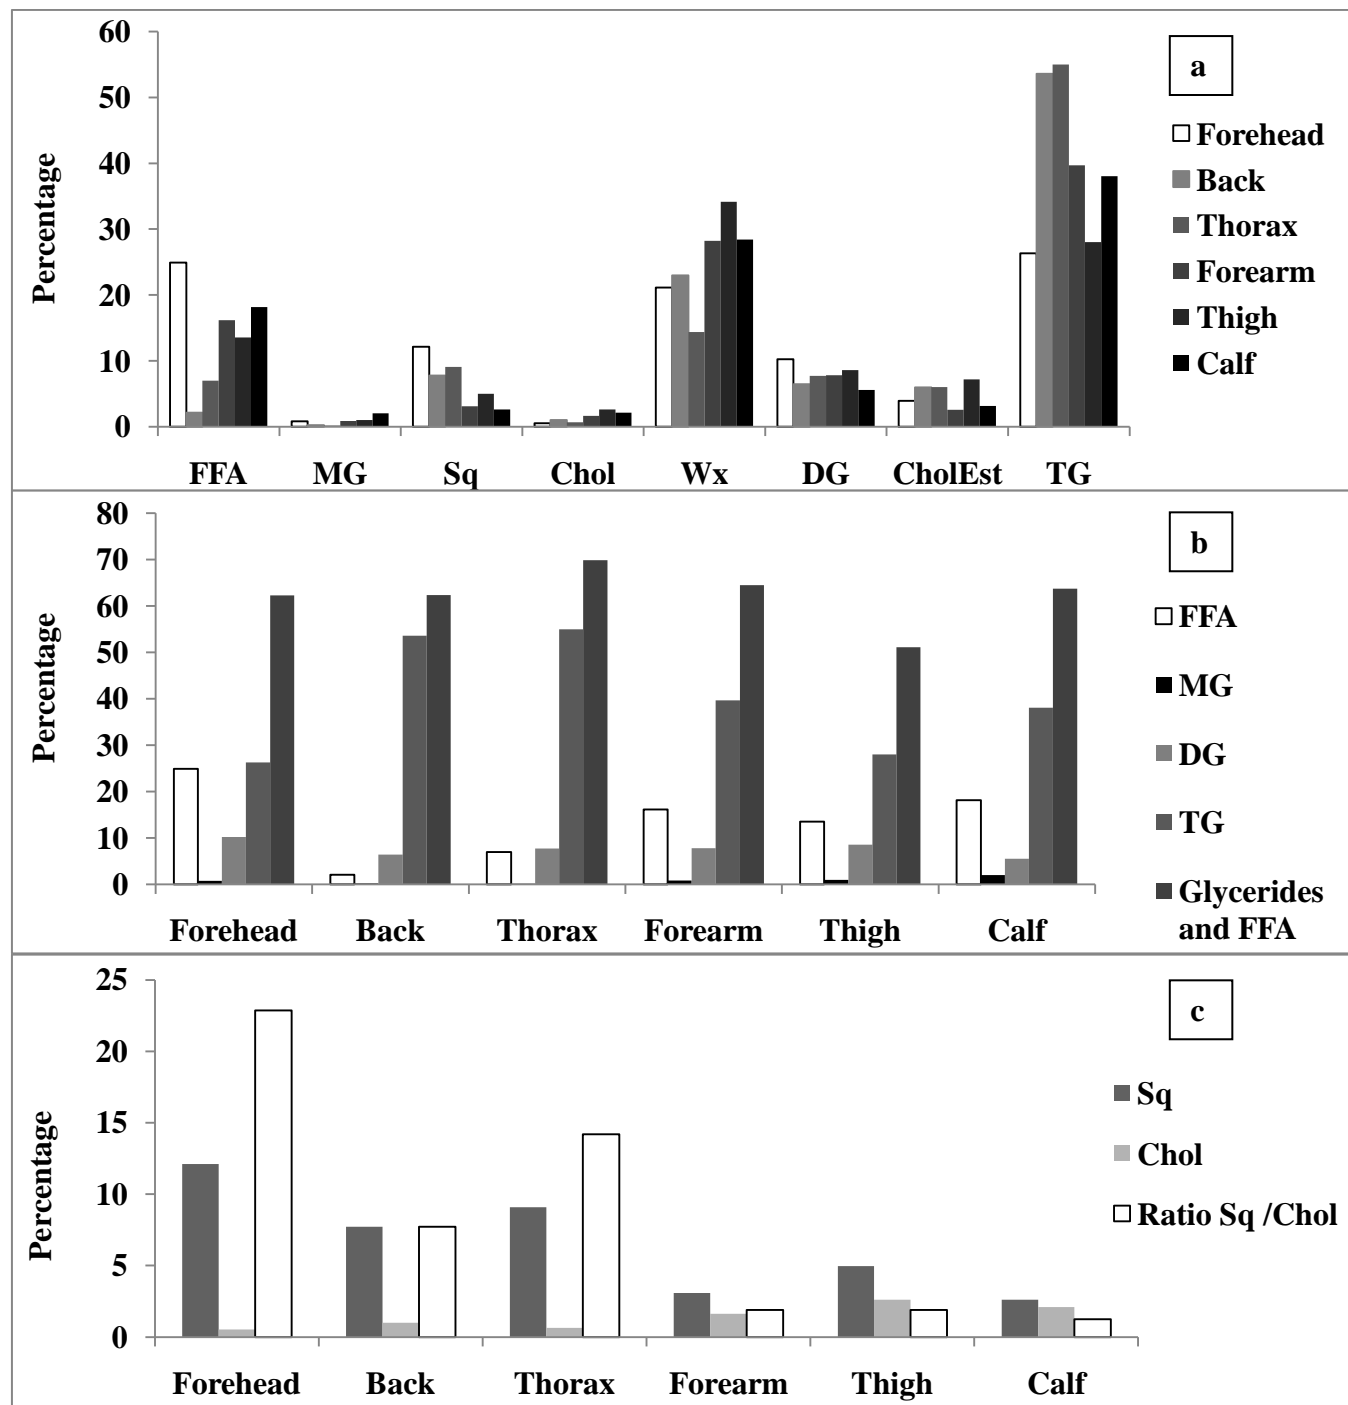

**Figure 2. Histograms of the mean (n=2) percentages of lipid classes for SSLs collected from six body areas. (a) all classes, (b) free fatty acids and glycerides, (c) squalene, cholesterol and ratio. FFA: Free Fatty Acids, MG: Monoglycerides, Sq: Squalene, Chol: Cholesterol, Wx: Waxes, DG: Diglycerides, CholEst: Cholesteryl Esters, TG: Triglycerides.**
